# Supplementary material for: Tobacco Smoke Condensate Induces Morphologic Changes in Human Papillomavirus-Positive Cervical Epithelial Cells Consistent with Epithelial to Mesenchymal Transition (EMT) with Activation of Receptor Tyrosine Kinases and Regulation of TGFB
Source: MDPI journal article supplement (doi:10.3390/ijms25094902), 2024-04-30
Supplement: s1 [file s1]

**Table S1.** Differential expression of genes in CSC-exposed (10 µg/mL) versus vehicle control cells.

| Symbol        | Entrez Gene Name                                | Expr<br><i>p</i> -Value | Expr Fold<br>Change | Location            |
|---------------|-------------------------------------------------|-------------------------|---------------------|---------------------|
| <i>FOXC2</i>  | forkhead box C2                                 | 3.26E-02                | 12.10               | Nucleus             |
| <i>CDH2</i>   | cadherin 2                                      | 1.69E-05                | 6.34                | Plasma Membrane     |
| <i>SNAI1</i>  | snail family transcriptional repressor 1        | 8.45E-03                | 2.80                | Nucleus             |
| <i>CTNNB1</i> | catenin beta 1                                  | 8.23E-05                | 2.66                | Nucleus             |
| <i>SNAI2</i>  | snail family transcriptional repressor 2        | 1.65E-03                | 2.60                | Nucleus             |
| <i>FN1</i>    | fibronectin 1                                   | 1.38E-04                | 2.39                | Extracellular Space |
| <i>TGFB2</i>  | transforming growth factor beta 2               | 1.54E-02                | 2.30                | Extracellular Space |
| <i>SMAD2</i>  | SMAD family member 2                            | 1.54E-03                | 2.13                | Nucleus             |
| <i>PDGFRB</i> | platelet derived growth factor receptor<br>beta | 1.81E-04                | 2.08                | Plasma Membrane     |

Note: This table was derived from IPA Canonical Pathway analysis on RT<sup>2</sup> EMT Profiler Array.  
Red = Upregulated gene expression fold changes.
